# Supplementary material
Source: PubMed Central journal article supplement (PMC9558116)
Supplement: mmc1.pdf [file mmc1.pdf]

## **Supporting information**

# **Pollution characteristics and sources of environmentally persistent free radicals and oxidation potential in fine particulate matter related to city lockdown (CLD) in Xi'an, China**

Dyussenova Ainur<sup>a</sup>, Qingcai Chen<sup>a\*</sup>, Yuqin Wang<sup>a</sup>, Hao Li<sup>a</sup>, Hao Lin<sup>a</sup>, Xuying Ma<sup>b</sup>, Xin Xu<sup>c</sup>

<sup>a</sup> School of Environmental Science and Engineering, Shaanxi University of Science and Technology, Xi'an 710021, China.

<sup>b</sup> College of Geomatics, Xi'an University of Science and Technology, Xi'an, 710054, China

<sup>c</sup> Xi'an Institute for Innovative Earth Environment Research, Xi'an, 710061, China

\*Corresponding author e-mail: chenqingcai@sust.edu.cn (Q. Chen)

Phone: (+86) 029-86132765

Address: School of Environmental Science and Engineering, Shaanxi University of Science and Technology, Weiyang District, Xi'an, Shaanxi, 710021, China

### **Contents:**

Number of pages: 22

S1: Acronym definitions (S2)

Figures: 12

Tables: 4

**S1: Acronym definitions:**

PM: particulate matter

CLD: city lockdown

EPR: electron paramagnetic resonance

EPFRs: environmentally persistent free radicals

ROS: reactive oxygen species

OP: oxidative potential

DTT: dithiothreitol

Abs: absorbance

WSIs: water-soluble ions

OC: organic carbon

EC: elemental carbon

PMF: positive matrix factorization

**Table S1.** Concentration of air pollutants before and during the CLD, compared to 2019.

| <b>Date</b> | <b>PM<sub>10</sub></b> | <b>PM<sub>2.5</sub></b> | <b>NO<sub>2</sub></b> | <b>O<sub>3</sub></b> | <b>SO<sub>2</sub></b> | <b>CO</b> |
|-------------|------------------------|-------------------------|-----------------------|----------------------|-----------------------|-----------|
| 2019.01.14  | 273                    | 230                     | 93                    | 17                   | 18                    | 2.16      |
| 2019.01.15  | 93                     | 40                      | 42                    | 37                   | 11                    | 0.77      |
| 2019.01.16  | 77                     | 33                      | 51                    | 17                   | 16                    | 0.94      |
| 2019.01.17  | 121                    | 73                      | 69                    | 19                   | 17                    | 1.21      |
| 2019.01.18  | 161                    | 111                     | 82                    | 10                   | 18                    | 1.53      |
| 2019.01.19  | 133                    | 81                      | 66                    | 19                   | 16                    | 1.21      |
| 2019.01.20  | 106                    | 57                      | 60                    | 22                   | 17                    | 1.03      |
| 2019.01.21  | 76                     | 36                      | 50                    | 30                   | 12                    | 0.78      |
| 2019.01.22  | 111                    | 67                      | 82                    | 18                   | 16                    | 1.20      |
| 2019.01.23  | 141                    | 92                      | 82                    | 25                   | 22                    | 1.54      |
| 2019.01.24  | 211                    | 153                     | 96                    | 7                    | 29                    | 2.00      |
| 2019.01.25  | 139                    | 74                      | 57                    | 23                   | 19                    | 1.11      |
| 2019.01.26  | 146                    | 104                     | 58                    | 22                   | 21                    | 1.30      |
| 2019.01.27  | 179                    | 140                     | 63                    | 14                   | 21                    | 1.47      |
| 2019.01.28  | 156                    | 120                     | 63                    | 22                   | 19                    | 1.42      |
| 2019.01.29  | 150                    | 111                     | 66                    | 34                   | 20                    | 1.33      |
| 2019.01.30  | 125                    | 99                      | 60                    | 21                   | 13                    | 1.25      |
| 2019.01.31  | 65                     | 37                      | 26                    | 36                   | 4                     | 0.76      |
| 2019.02.01  | 88                     | 54                      | 36                    | 35                   | 8                     | 1.02      |
| 2019.02.02  | 168                    | 82                      | 36                    | 41                   | 9                     | 1.03      |
| 2019.02.03  | 130                    | 33                      | 23                    | 53                   | 7                     | 0.53      |
| 2020.01.14  | 113                    | 90                      | 49                    | 22                   | 14                    | 1.22      |
| 2020.01.15  | 154                    | 152                     | 55                    | 10                   | 11                    | 1.47      |
| 2020.01.16  | 165                    | 169                     | 55                    | 9                    | 11                    | 1.82      |
| 2020.01.17  | 211                    | 195                     | 68                    | 7                    | 10                    | 2.00      |
| 2020.01.18  | 209                    | 191                     | 68                    | 15                   | 8                     | 1.68      |
| 2020.01.19  | 87                     | 48                      | 47                    | 33                   | 10                    | 0.79      |
| 2020.01.20  | 99                     | 57                      | 49                    | 31                   | 16                    | 1.00      |
| 2020.01.21  | 118                    | 91                      | 50                    | 31                   | 18                    | 1.37      |
| 2020.01.22  | 158                    | 145                     | 51                    | 29                   | 14                    | 1.50      |
| 2020.01.23  | 229                    | 223                     | 58                    | 26                   | 14                    | 1.90      |
| 2020.01.24  | 225                    | 217                     | 34                    | 41                   | 14                    | 1.81      |
| 2020.01.25  | 226                    | 225                     | 24                    | 46                   | 12                    | 1.75      |
| 2020.01.26  | 159                    | 158                     | 21                    | 49                   | 9                     | 1.41      |
| 2020.01.27  | 70                     | 71                      | 16                    | 62                   | 8                     | 1.00      |
| 2020.01.28  | 57                     | 56                      | 21                    | 51                   | 8                     | 1.07      |
| 2020.01.29  | 67                     | 64                      | 23                    | 52                   | 10                    | 1.03      |
| 2020.01.30  | 75                     | 70                      | 29                    | 61                   | 12                    | 1.02      |

**Table S1.** Continued

|            |     |     |    |    |    |      |
|------------|-----|-----|----|----|----|------|
| 2020.01.31 | 118 | 117 | 33 | 62 | 14 | 1.28 |
| 2020.02.01 | 135 | 138 | 31 | 63 | 17 | 1.49 |
| 2020.02.02 | 71  | 64  | 15 | 73 | 10 | 0.83 |
| 2020.02.03 | 54  | 44  | 22 | 58 | 13 | 0.83 |

**Table S2.** Concentration of 9 water-soluble ions before and during the CLD, compared to 2019.

| Date       | Na <sup>+</sup> | K <sup>+</sup> | Mg <sup>2+</sup> | Ca <sup>2+</sup> | NH <sub>4</sub> <sup>+</sup> | NO <sub>3</sub> <sup>-</sup> | SO <sub>4</sub> <sup>2-</sup> | F <sup>-</sup> | Cl <sup>-</sup> |
|------------|-----------------|----------------|------------------|------------------|------------------------------|------------------------------|-------------------------------|----------------|-----------------|
| 2019.01.14 | 0.48            | 1.81           | 0.16             | 4.31             | 21.09                        | 32.18                        | 20.57                         | 0.31           | 4.64            |
| 2019.01.15 | 0.94            | 0.53           | 0.21             | 5.93             | 2.94                         | 4.1                          | 5.9                           | 0.22           | 1.51            |
| 2019.01.16 | 0.79            | 0.99           | 0.21             | 5.89             | 5.44                         | 6.52                         | 6.65                          | 0.25           | 3.88            |
| 2019.01.17 | 0.65            | 1.42           | 0.22             | 5.66             | 9.62                         | 13.75                        | 8.94                          | 0.31           | 4.93            |
| 2019.01.18 | 0.66            | 1.51           | 0.22             | 5.38             | 11.99                        | 17.56                        | 10.31                         | 0.32           | 5.67            |
| 2019.01.19 | 0.73            | 1              | 0.25             | 6.82             | 7.39                         | 10.12                        | 8.01                          | 0.32           | 3.64            |
| 2019.01.20 | 0.78            | 0.53           | 0.29             | 8.19             | 4.85                         | 6.39                         | 7.68                          | 0.3            | 2.32            |
| 2019.01.21 | 0.84            | 0.8            | 0.28             | 7.16             | 5.42                         | 7.42                         | 7.94                          | 0.26           | 3.26            |
| 2019.01.22 | 0.38            | 1.11           | 0.17             | 4.84             | 8.17                         | 11.96                        | 6.51                          | 0.22           | 3.93            |
| 2019.01.23 | 0.78            | 1.95           | 0.24             | 6.24             | 11.56                        | 15.65                        | 10.44                         | 0.34           | 6.44            |
| 2019.01.24 | 0.98            | 2.26           | 0.38             | 7.94             | 16.27                        | 23.32                        | 14.24                         | 0.5            | 8.18            |
| 2019.01.25 | 0.97            | 1              | 0.29             | 7.37             | 9.08                         | 14.56                        | 9.63                          | 0.39           | 3.13            |
| 2019.01.26 | 0.53            | 1.32           | 0.28             | 5.44             | 14.52                        | 24.11                        | 11.14                         | 0.59           | 4.12            |
| 2019.01.27 | 0.51            | 2.22           | 0.31             | 6.1              | 23.33                        | 38.8                         | 21.31                         | 0.45           | 6.12            |
| 2019.01.28 | 0.62            | 2.2            | 0.31             | 6.46             | 17.53                        | 25.05                        | 15.2                          | 0.44           | 7.33            |
| 2019.01.29 | 0.44            | 1.61           | 0.22             | 5.29             | 14.42                        | 21.74                        | 12.32                         | 0.31           | 5.39            |
| 2019.01.30 | 0.03            | 0.46           | 0.04             | 0.63             | 7.85                         | 10.95                        | 10.01                         | 0.11           | 2.35            |
| 2019.01.31 | 0.31            | 0.53           | 0.11             | 2.58             | 4.49                         | 4.71                         | 8.1                           | 0.14           | 1.32            |
| 2019.02.01 | 0.35            | 1.39           | 0.12             | 2.17             | 11.13                        | 11.3                         | 15.09                         | 0.23           | 3.58            |
| 2019.02.02 | 3.27            | 0.77           | 0.62             | 12.21            | 5.14                         | 6.69                         | 15.6                          | 0.37           | 3.6             |
| 2019.02.03 | 1.46            | 0.71           | 0.36             | 7.43             | 2.66                         | 3.46                         | 6.6                           | 0.2            | 2.74            |
| 2020.01.14 | 0.38            | 0.91           | 0.26             | 4.62             | 13.5                         | 2.42                         | 2.36                          | 0.09           | 0.31            |
| 2020.01.15 | 0.02            | 0.69           | 0                | 0                | 18.1                         | 22.55                        | 20.18                         | 0.12           | 2.08            |
| 2020.01.16 | 0.03            | 1.09           | 0.01             | 0.29             | 20.59                        | 26.14                        | 22.44                         | 0.14           | 2.92            |
| 2020.01.17 | 0.09            | 1.45           | 0.03             | 0.38             | 31.36                        | 4.46                         | 4.09                          | 0.09           | 0.53            |
| 2020.01.18 | 0.25            | 1.07           | 0.11             | 2.02             | 22.93                        | 29.8                         | 26.58                         | 0.19           | 3.74            |
| 2020.01.19 | 1.06            | 0.56           | 0.18             | 4.55             | 3.18                         | 3.89                         | 6.26                          | 0.14           | 2.61            |
| 2020.01.20 | 0.65            | 0.96           | 0.17             | 3.96             | 7.13                         | 9.79                         | 8.22                          | 0.23           | 2.96            |
| 2020.01.21 | 0.35            | 1.42           | 0.16             | 2.36             | 10.35                        | 15.82                        | 10.08                         | 0.23           | 4.06            |
| 2020.01.22 | 0.16            | 2.42           | 0.17             | 1.62             | 20.37                        | 29.6                         | 20.19                         | 0.27           | 5.17            |
| 2020.01.23 | 0.3             | 2.65           | 0.12             | 1.13             | 27.69                        | 38.68                        | 27.92                         | 0.21           | 6.33            |
| 2020.01.24 | 0.1             | 3.08           | 0.19             | 0.2              | 21.35                        | 24.1                         | 29.44                         | 0.22           | 4.34            |
| 2020.01.25 | 0.1             | 6.16           | 0.44             | 0.11             | 22.03                        | 23.09                        | 35.4                          | 0.25           | 5.15            |
| 2020.01.26 | 0               | 0.77           | 0.03             | 0.15             | 11.4                         | 10.26                        | 17.32                         | 0.1            | 1.43            |
| 2020.01.27 | 0               | 0.74           | 0.04             | 0.12             | 9.87                         | 8.91                         | 14.94                         | 0.13           | 1.46            |
| 2020.01.28 | 0.02            | 0.83           | 0.05             | 0.36             | 7.23                         | 6.81                         | 11.24                         | 0.13           | 1.49            |
| 2020.01.29 | 0.02            | 0.69           | 0.06             | 0.54             | 6.74                         | 6.02                         | 11.18                         | 0.15           | 1.11            |

**Table S2.** Continued

|            |      |      |      |      |       |       |       |      |      |
|------------|------|------|------|------|-------|-------|-------|------|------|
| 2020.01.30 | 0.13 | 1.61 | 0.07 | 0.55 | 10.53 | 10.74 | 14.83 | 0.21 | 2.83 |
| 2020.01.31 | 0.11 | 1.41 | 0.11 | 0.94 | 14.25 | 17.27 | 16.64 | 0.21 | 3.74 |
| 2020.02.01 | 0.18 | 1.15 | 0.04 | 0.4  | 12.17 | 13.15 | 15    | 0.15 | 3.73 |
| 2020.02.02 | 0.24 | 0.34 | 0.06 | 1.07 | 3.05  | 3.48  | 5.01  | 0.13 | 0.82 |
| 2020.02.03 | 0.24 | 1.02 | 0.08 | 0.96 | 6.2   | 8.31  | 6.53  | 0.16 | 2.5  |

**Table S3.** The concentrations of organic carbon (OC) and elemental carbon (EC), OC/EC ratio before and during the CLD, compared to 2019.

| <b>Date</b> | <b>OC ug/m<sup>3</sup></b> | <b>EC ug/m<sup>3</sup></b> | <b>OC/EC ratio</b> |
|-------------|----------------------------|----------------------------|--------------------|
| 2019.01.14  | 47.42                      | 2.18                       | 21.71              |
| 2019.01.15  | 23.72                      | 2.19                       | 10.84              |
| 2019.01.16  | 27.61                      | 2.49                       | 11.09              |
| 2019.01.17  | 49.88                      | 5.22                       | 9.55               |
| 2019.01.18  | 39.26                      | 8.20                       | 4.78               |
| 2019.01.19  | 33.73                      | 3.72                       | 9.06               |
| 2019.01.20  | 20.51                      | 7.87                       | 2.61               |
| 2019.01.21  | 30.40                      | 3.99                       | 7.62               |
| 2019.01.22  | 40.70                      | 3.34                       | 12.20              |
| 2019.01.23  | 43.95                      | 2.03                       | 21.62              |
| 2019.01.24  | 51.57                      | 7.36                       | 7.00               |
| 2019.01.25  | 25.95                      | 5.72                       | 4.54               |
| 2019.01.26  | 37.85                      | 3.33                       | 11.38              |
| 2019.01.27  | 47.27                      | 2.91                       | 16.26              |
| 2019.01.28  | 43.60                      | 3.12                       | 13.96              |
| 2019.01.29  | 38.74                      | 2.13                       | 18.17              |
| 2019.01.30  | 18.86                      | 1.07                       | 17.58              |
| 2019.01.31  | 16.72                      | 3.54                       | 4.73               |
| 2019.02.01  | 28.03                      | 2.36                       | 11.89              |
| 2019.02.02  | 27.51                      | 8.52                       | 3.23               |
| 2019.02.03  | 14.97                      | 7.67                       | 1.95               |
| 2020.01.14  | 21.93                      | 2.52                       | 8.71               |
| 2020.01.15  | 17.58                      | 1.76                       | 10.00              |
| 2020.01.16  | 20.97                      | 0.84                       | 24.97              |
| 2020.01.17  | 26.90                      | 1.50                       | 17.89              |
| 2020.01.18  | 28.61                      | 1.50                       | 19.09              |
| 2020.01.19  | 21.56                      | 1.09                       | 19.76              |
| 2020.01.20  | 22.21                      | 3.87                       | 5.74               |
| 2020.01.21  | 29.97                      | 2.32                       | 12.92              |
| 2020.01.22  | 38.35                      | 2.13                       | 18.01              |
| 2020.01.23  | 42.12                      | 1.69                       | 24.94              |
| 2020.01.24  | 34.70                      | 1.66                       | 20.85              |
| 2020.01.25  | 25.15                      | 1.52                       | 16.49              |
| 2020.01.26  | 12.04                      | 0.83                       | 14.43              |
| 2020.01.27  | 10.01                      | 5.74                       | 1.74               |
| 2020.01.28  | 17.00                      | 0.93                       | 18.32              |

**Table S3.** Continued

---

|            |       |      |       |
|------------|-------|------|-------|
| 2020.01.29 | 19.61 | 0.97 | 20.12 |
| 2020.01.30 | 26.87 | 1.35 | 19.92 |
| 2020.01.31 | 29.61 | 1.48 | 20.01 |
| 2020.02.01 | 25.11 | 0.28 | 90.20 |
| 2020.02.02 | 14.83 | 0.47 | 31.63 |
| 2020.02.03 | 23.49 | 0.55 | 43.07 |

---



**Table S4.** Signal characteristics and EPFR concentrations in atmospheric PM<sub>2.5</sub> samples before and during the CLD, same as in 2019.

| Sampling date | PM <sub>2.5</sub> concentration (µg/m <sup>3</sup> ) | <i>g</i> factor | $\Delta H_{p-p}$ | Spin concentration in PM <sub>2.5</sub> (×10 <sup>18</sup> spins/g) | Atmospheric concentration (×10 <sup>14</sup> spins/m <sup>3</sup> ) |
|---------------|------------------------------------------------------|-----------------|------------------|---------------------------------------------------------------------|---------------------------------------------------------------------|
| 2019.01.14    | 230                                                  | 2.0028          | 5.5106           | 1.33E+18                                                            | 3.06E+14                                                            |
| 2019.01.15    | 40                                                   | 2.0029          | 4.9514           | 7.92E+18                                                            | 3.17E+14                                                            |
| 2019.01.16    | 33                                                   | 2.0028          | 5.5946           | 1.44E+19                                                            | 4.75E+14                                                            |
| 2019.01.17    | 73                                                   | 2.0028          | 5.8028           | 4.92E+18                                                            | 3.59E+14                                                            |
| 2019.01.18    | 111                                                  | 2.0025          | 5.8456           | 2.66E+18                                                            | 2.95E+14                                                            |
| 2019.01.19    | 81                                                   | 2.0027          | 5.707            | 4.46E+18                                                            | 3.62E+14                                                            |
| 2019.01.20    | 57                                                   | 2.0028          | 5.4675           | 5.67E+18                                                            | 3.23E+14                                                            |
| 2019.01.21    | 36                                                   | 2.0028          | 5.6146           | 7.92E+18                                                            | 2.85E+14                                                            |
| 2019.01.22    | 67                                                   | 2.0028          | 5.7204           | 3.42E+18                                                            | 2.29E+14                                                            |
| 2019.01.23    | 92                                                   | 2.0028          | 5.7482           | 4.07E+18                                                            | 3.74E+14                                                            |
| 2019.01.24    | 153                                                  | 2.0026          | 5.7459           | 3.05E+18                                                            | 4.66E+14                                                            |
| 2019.01.25    | 74                                                   | 2.0027          | 5.2702           | 4.37E+18                                                            | 3.24E+14                                                            |
| 2019.01.26    | 104                                                  | 2.0028          | 5.2884           | 3.12E+18                                                            | 3.24E+14                                                            |
| 2019.01.27    | 140                                                  | 2.0028          | 6.2825           | 3.28E+18                                                            | 4.59E+14                                                            |
| 2019.01.28    | 120                                                  | 2.0029          | 5.5364           | 4.52E+18                                                            | 5.42E+14                                                            |
| 2019.01.29    | 111                                                  | 2.0028          | 5.1267           | 2.75E+18                                                            | 3.05E+14                                                            |
| 2019.01.30    | 99                                                   | 2.0031          | 4.9503           | 1.11E+18                                                            | 1.10E+14                                                            |
| 2019.01.31    | 37                                                   | 2.0031          | 4.8426           | 2.63E+18                                                            | 9.74E+13                                                            |
| 2019.02.01    | 54                                                   | 2.0029          | 4.8177           | 2.86E+18                                                            | 1.54E+14                                                            |
| 2019.02.02    | 82                                                   | 2.003           | 5.1103           | 4.23E+18                                                            | 3.47E+14                                                            |
| 2019.02.03    | 33                                                   | 2.0031          | 5.6611           | 6.01E+18                                                            | 1.98E+14                                                            |
| 2020.01.14    | 90                                                   | 2.0032          | 5.1307           | 2.43E+18                                                            | 2.19E+14                                                            |
| 2020.01.15    | 152                                                  | 2.0029          | 5.9517           | 8.30E+17                                                            | 1.26E+14                                                            |
| 2020.01.16    | 169                                                  | 2.0029          | 4.6332           | 5.05E+17                                                            | 8.53E+13                                                            |
| 2020.01.17    | 195                                                  | 2.0028          | 6.1481           | 8.54E+17                                                            | 1.67E+14                                                            |
| 2020.01.18    | 191                                                  | 2.0033          | 5.0538           | 8.16E+17                                                            | 1.56E+14                                                            |
| 2020.01.19    | 48                                                   | 2.003           | 5.7787           | 4.31E+18                                                            | 2.07E+14                                                            |
| 2020.01.20    | 57                                                   | 2.003           | 5.6396           | 5.42E+18                                                            | 3.09E+14                                                            |
| 2020.01.21    | 91                                                   | 2.0031          | 5.4585           | 3.45E+18                                                            | 3.14E+14                                                            |
| 2020.01.22    | 145                                                  | 2.003           | 5.0656           | 1.73E+18                                                            | 2.51E+14                                                            |
| 2020.01.23    | 223                                                  | 2.0031          | 4.9591           | 1.08E+18                                                            | 2.41E+14                                                            |
| 2020.01.24    | 217                                                  | 2.003           | 4.6044           | 6.57E+17                                                            | 1.43E+14                                                            |
| 2020.01.25    | 225                                                  | 2.0031          | 4.4476           | 5.15E+17                                                            | 1.16E+14                                                            |
| 2020.01.26    | 158                                                  | 2.0031          | 3.1282           | 1.24E+17                                                            | 1.95E+13                                                            |

**Table S4.** Continued

---

|            |     |        |        |          |          |
|------------|-----|--------|--------|----------|----------|
| 2020.01.27 | 71  | 2.003  | 6.2308 | 1.61E+18 | 1.14E+14 |
| 2020.01.28 | 56  | 2.0031 | 4.4229 | 1.28E+18 | 7.17E+13 |
| 2020.01.29 | 64  | 2.0029 | 4.492  | 1.15E+18 | 7.36E+13 |
| 2020.01.30 | 70  | 2.0031 | 4.6518 | 1.97E+18 | 1.38E+14 |
| 2020.01.31 | 117 | 2.0032 | 4.958  | 1.45E+18 | 1.70E+14 |
| 2020.02.01 | 138 | 2.0031 | 4.5375 | 7.66E+17 | 1.06E+14 |
| 2020.02.02 | 64  | 2.0031 | 5.042  | 1.42E+18 | 9.07E+13 |
| 2020.02.03 | 44  | 2.0031 | 4.8571 | 3.14E+18 | 1.38E+14 |

---

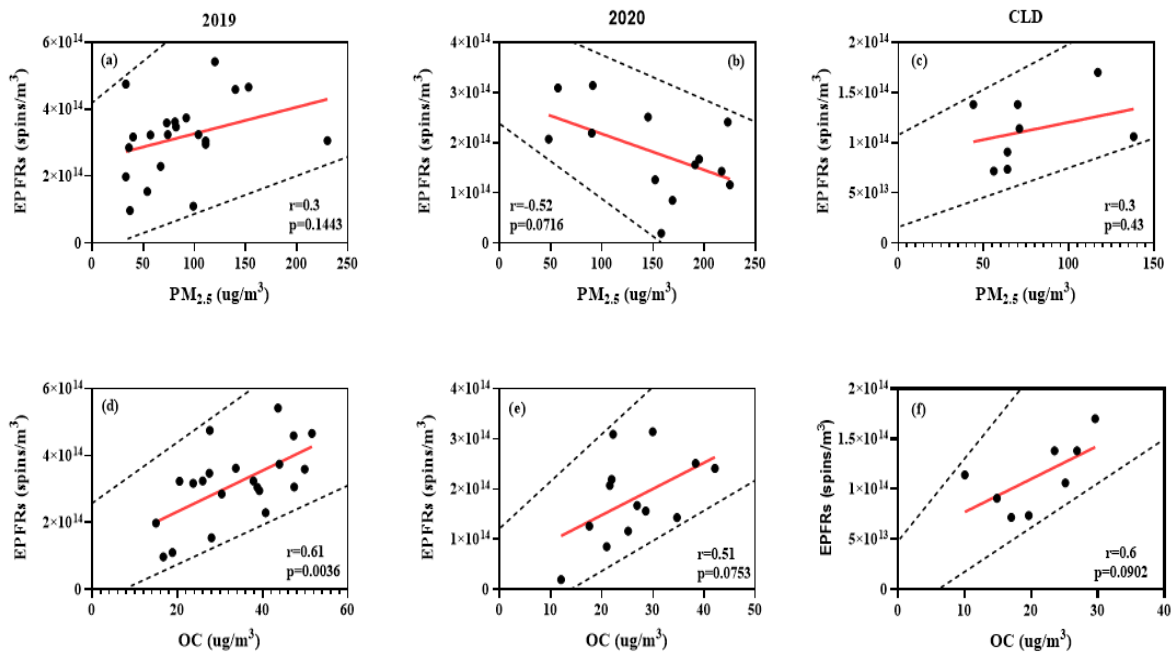

**Fig.S1.** The correlation analysis between EPFRs and PM<sub>2.5</sub> (a, b, c); OC (d, e, f) before and during CLD.

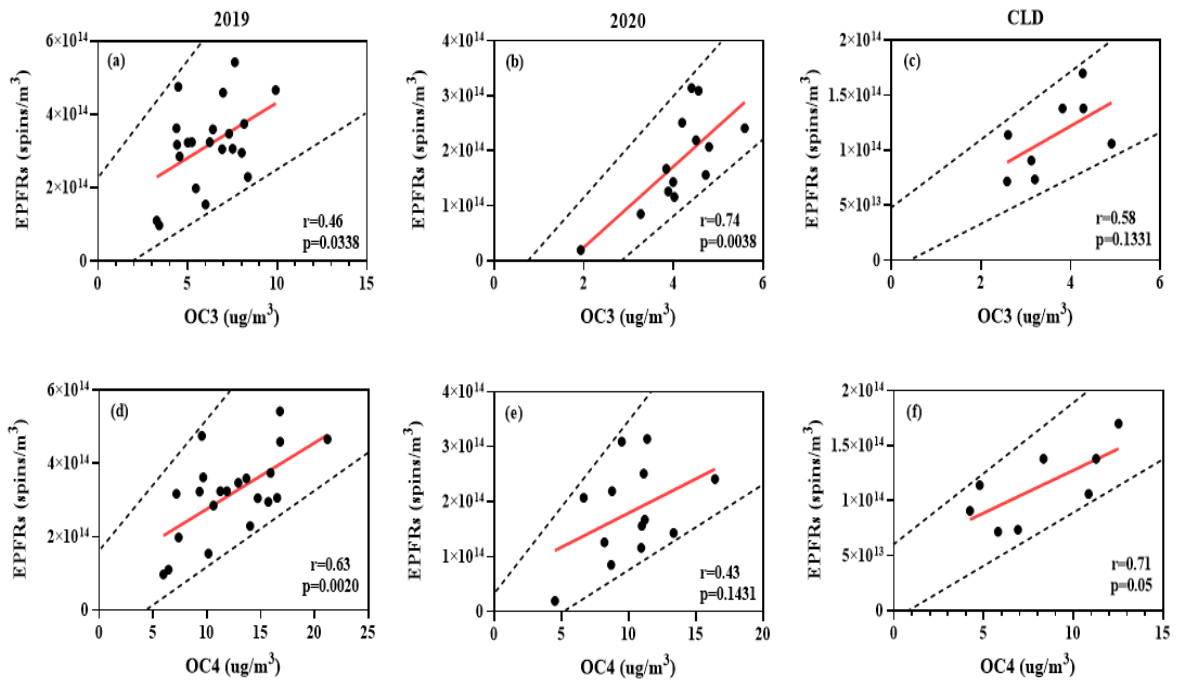

**Fig.S2.** The correlation analysis between EPRs and OC3 (a, b, c); OC4 (d, e, f) before and during CLD.

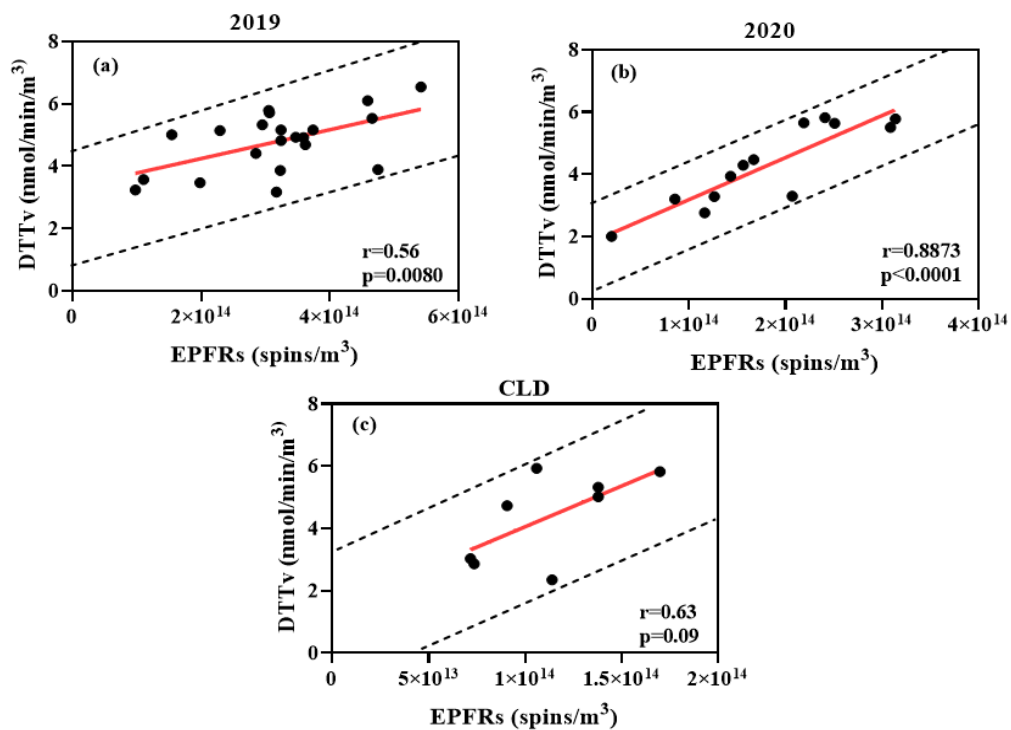

**Fig.S3.** The correlation analysis between DTTv and EPFRs (a, b, c) before and during CLD.

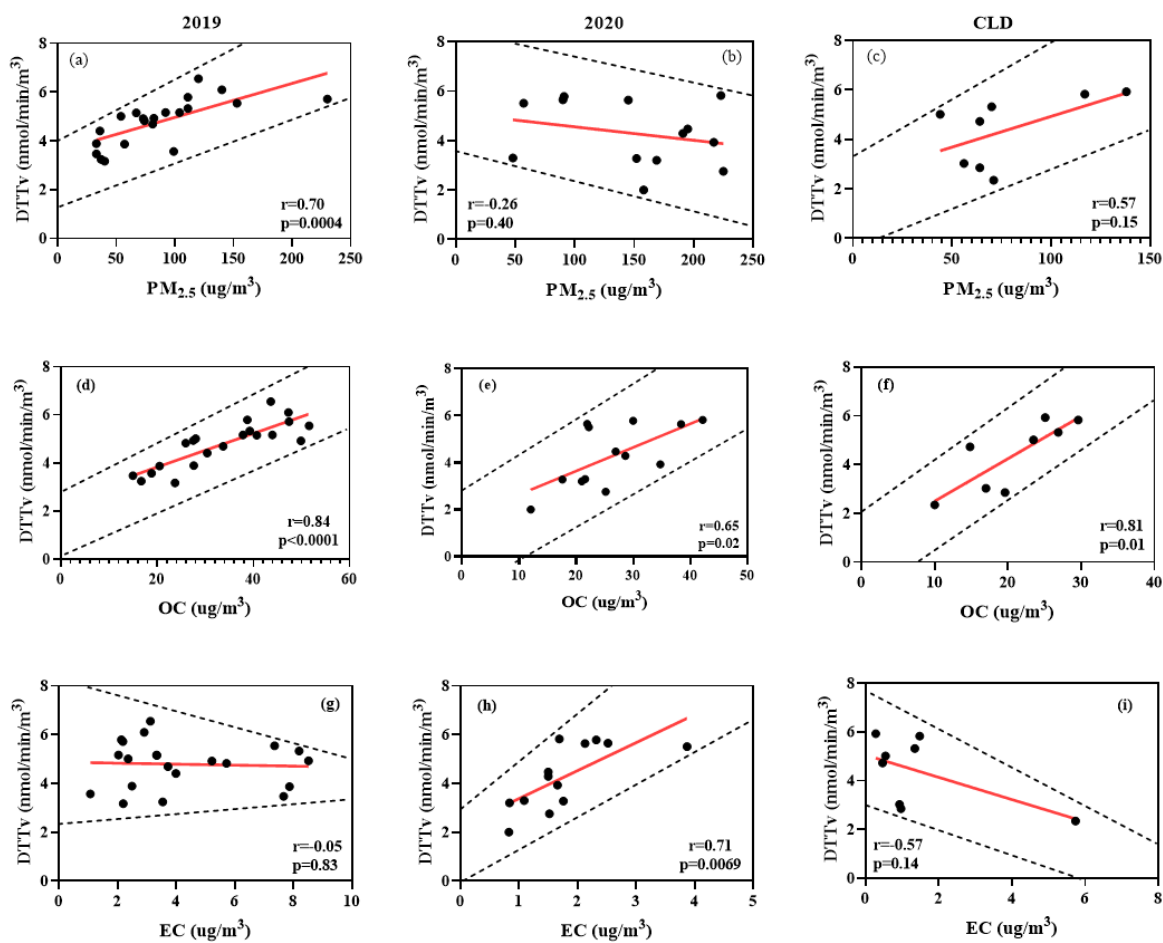

**Fig.S4.** The correlation analysis between DTTv and PM<sub>2.5</sub> (a, b, c); OC (d, e, f), and EC (g, h, i) before and during CLD.

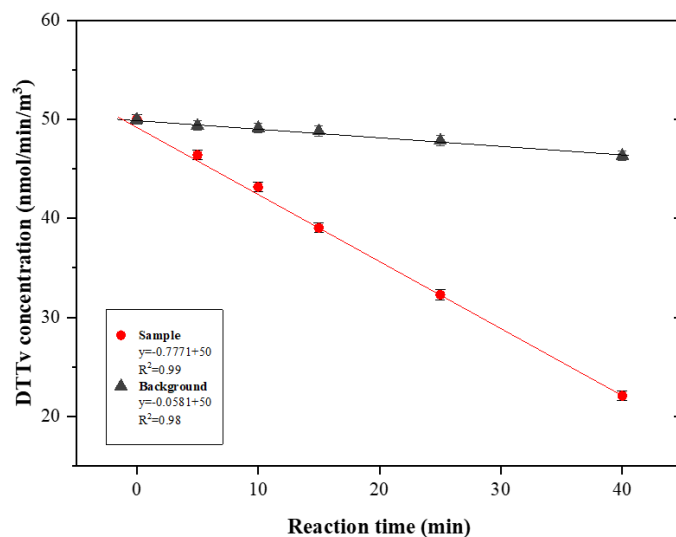

**Fig.S5.** Parallelism of random samples ( $n=3$ ) and background ( $n=3$ ) during the city lockdown in Xi'an, 2020. The error bars indicate the standard deviation.

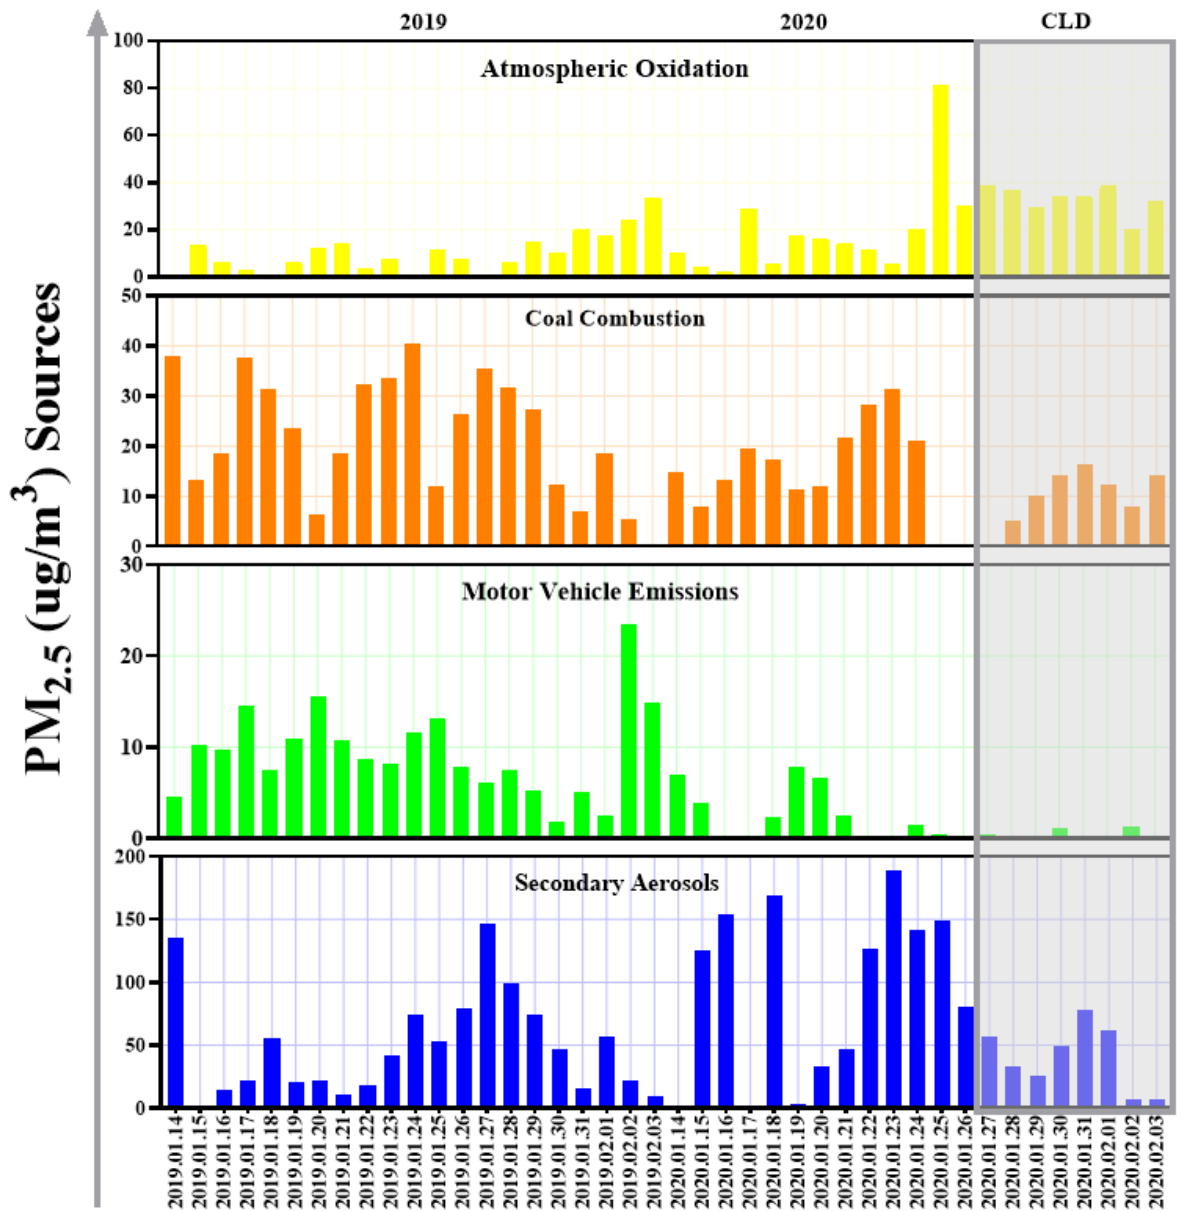

**Fig.S6.** Analysis of PM<sub>2.5</sub> source contributions by PMF model before and during the CLD. The bars represent the concentrations of various species to the factors.



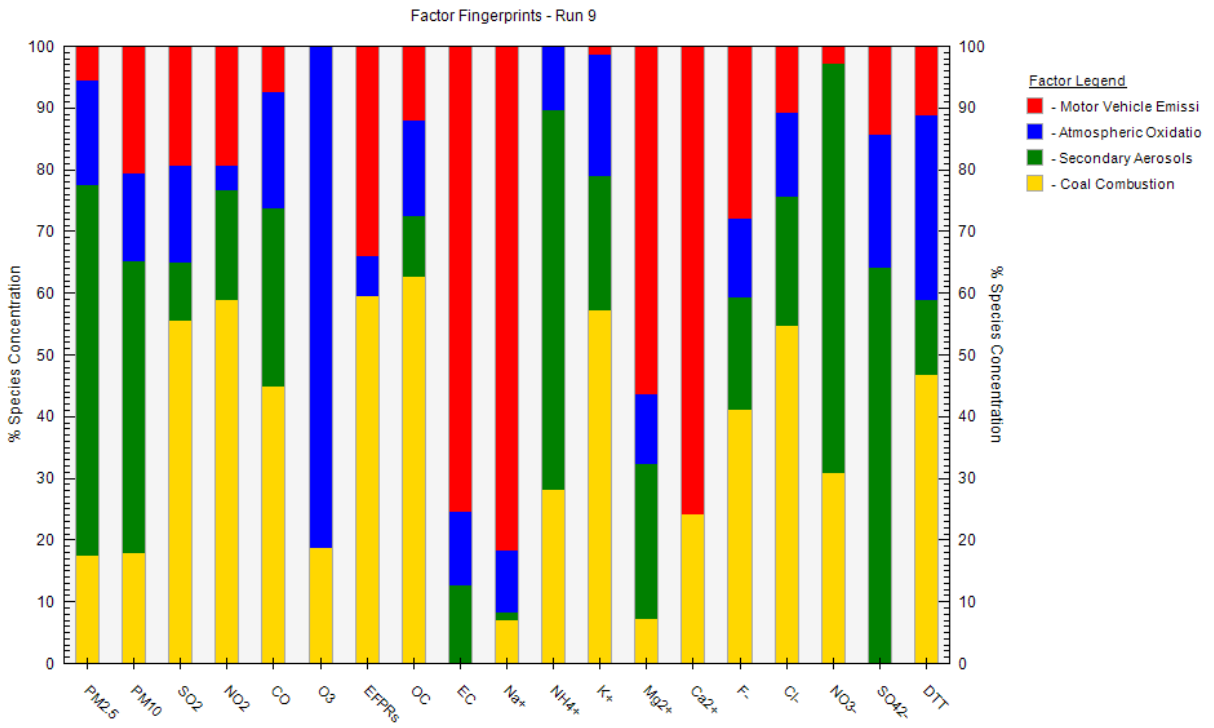

**Fig.S7.** Source apportionment of PM<sub>2.5</sub> based on PMF model analysis before and during the city lockdown (CLD)

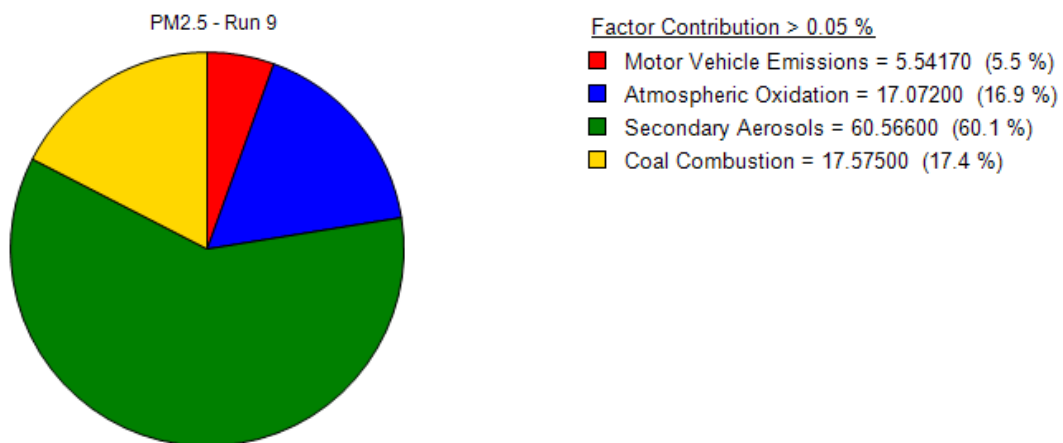

**Fig.S8.** Percentages of the different source contributions to PM<sub>2.5</sub> based on PMF model analysis before and during the city lockdown (CLD)

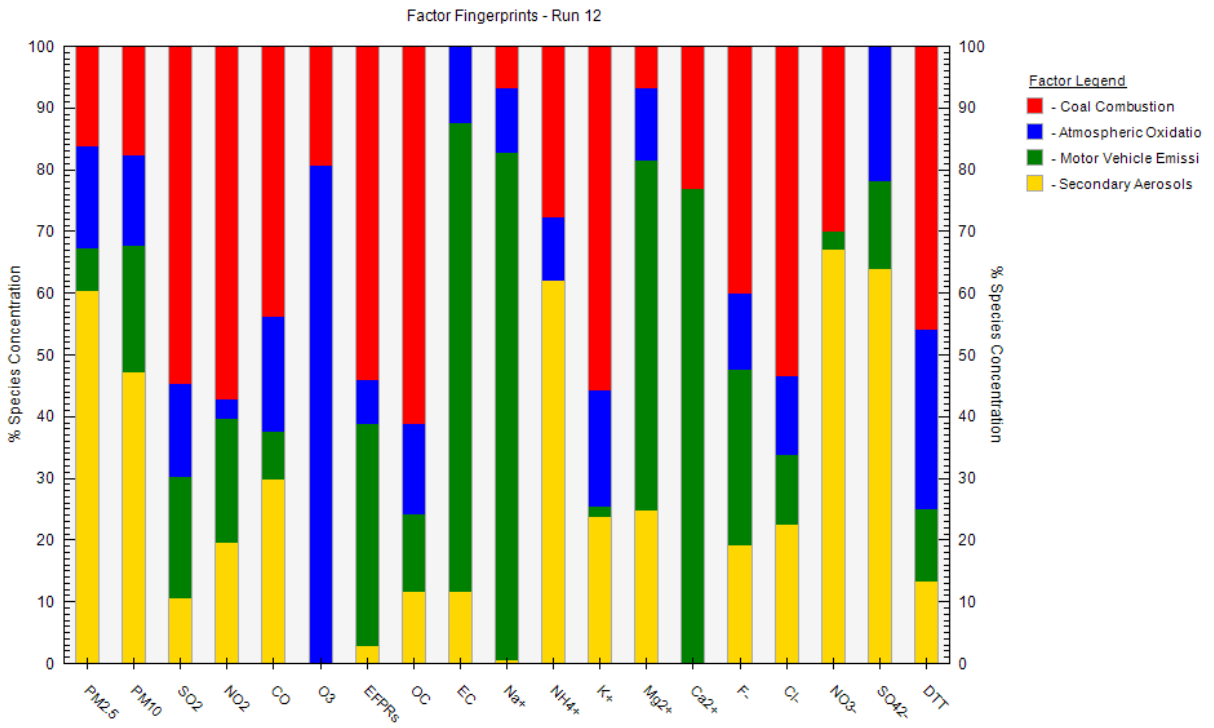

**Fig.S9.** Source apportionment of EPFRs based on PMF model analysis before and during the city lockdown (CLD)

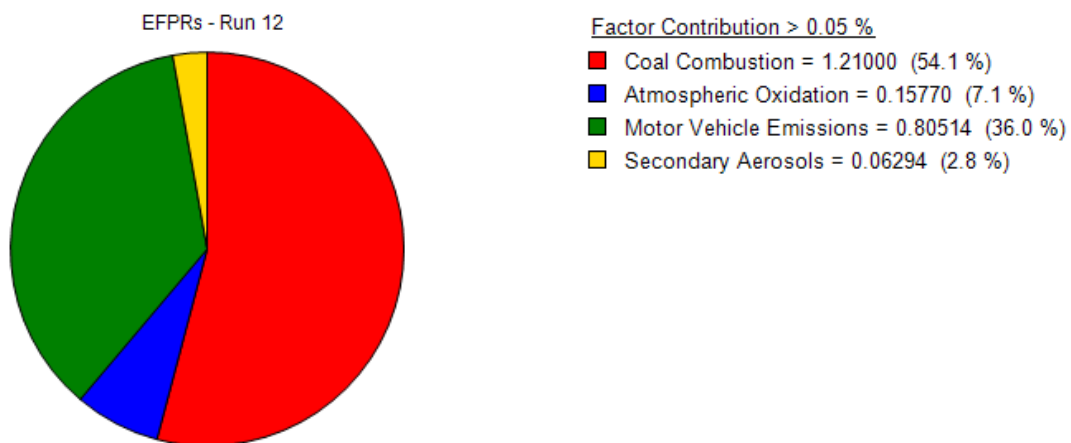

**Fig.S10.** Percentages of the different source contributions to EPFRs based on PMF model analysis before and during the city lockdown (CLD)

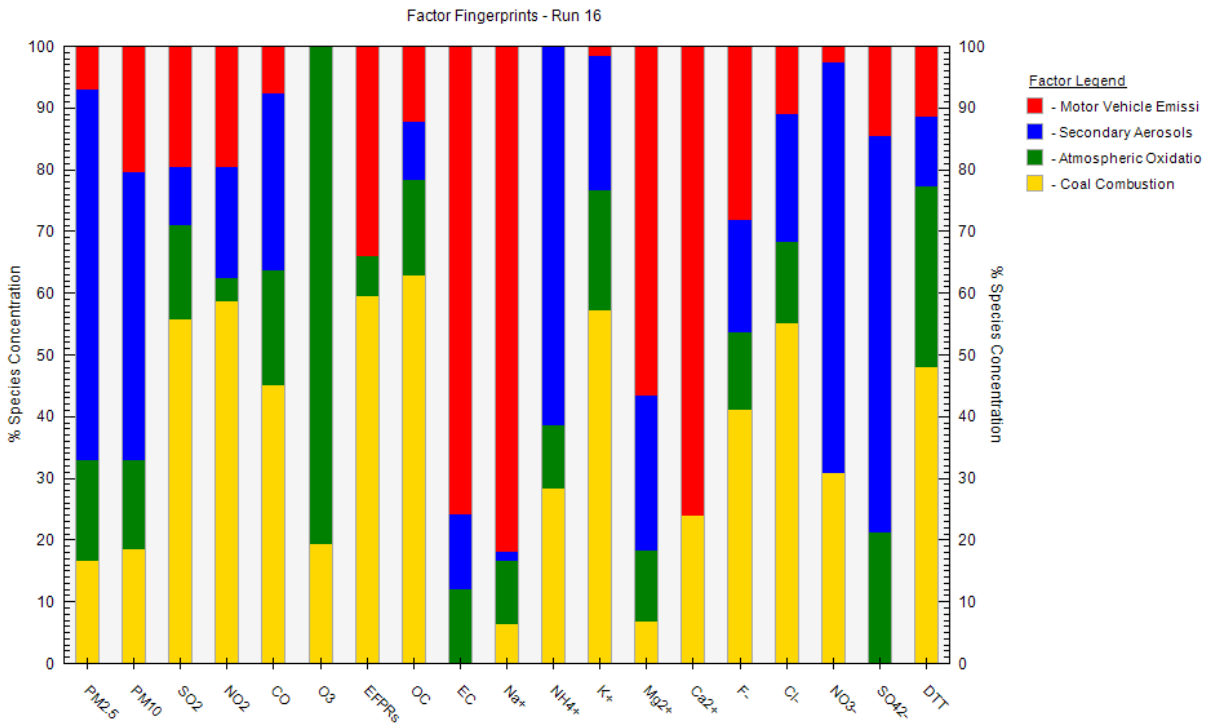

**Fig.S11.** Source apportionment of DTTv based on PMF model analysis before and during the city lockdown (CLD)

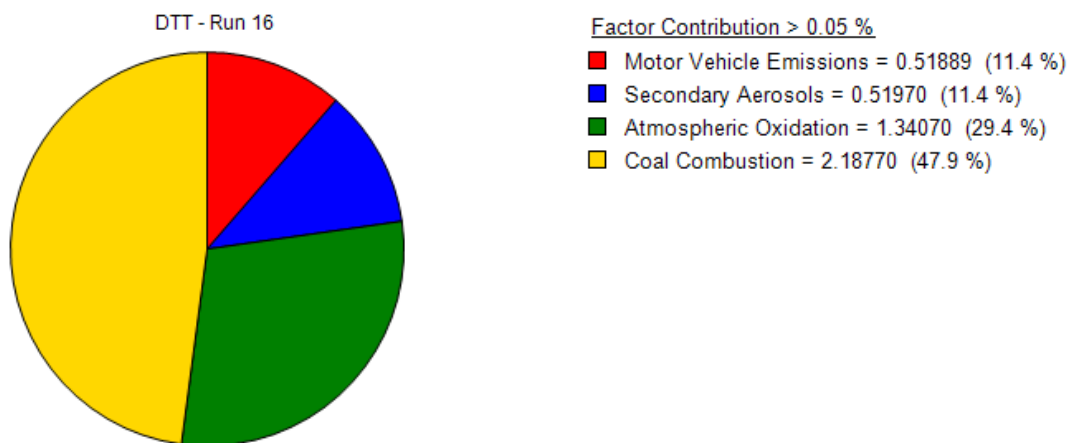

**Fig.S12.** Percentages of the different source contributions to DTTv based on PMF model analysis before and during the city lockdown (CLD)
